# Supplementary material
Source: PubMed Central journal article supplement (PMC5277521)
Supplement: JCM.01853-16_zjm999095351s1.pdf [file JCM.01853-16_zjm999095351s1.pdf]

Supplementary Table 1: Resistance mechanisms and carbapenem MICs of *Enterobacteriaceae* yielding false, doubtful or non-interpretable results with one of the four evaluated assays.

| Species              | Carbapenemase production | Other resistance mechanisms                                    | MIC (µg/ml)<br>Imipenem | MIC (µg/ml)<br>Meropenem | MIC (µg/ml)<br>Ertapenem | BYG      | BCT      | RCNP     | NRCK |
|----------------------|--------------------------|----------------------------------------------------------------|-------------------------|--------------------------|--------------------------|----------|----------|----------|------|
| <i>K. pneumoniae</i> | None                     | DHA                                                            | 0,25                    | 0,047                    | 0,38                     | <b>P</b> | N        | N        | N    |
| <i>E. cloacae</i>    | None                     | AmpC overexpression and phenotypically assessed impermeability | 0,75                    | 0,25                     | 2                        | N        | <b>D</b> | N        | N    |
| <i>K. oxytoca</i>    | None                     | K-OXY overexpression                                           | 0,19                    | 0,064                    | 0,032                    | N        | <b>D</b> | N        | N    |
| <i>K. pneumoniae</i> | KPC-3                    |                                                                | > 32                    | > 32                     | > 32                     | P        | <b>D</b> | P        | P    |
| <i>K. pneumoniae</i> | OXA-48                   | DHA, CTX-M9                                                    | 0,75                    | 0,5                      | 2                        | P        | <b>D</b> | P        | P    |
| <i>E. coli</i>       | OXA-48                   |                                                                | 3                       | 0,5                      | 0,5                      | P        | <b>D</b> | P        | P    |
| <i>E. cloacae</i>    | None                     | AmpC overexpression and phenotypically assessed impermeability | 1                       | 0,19                     | 0,5                      | N        | N        | <b>D</b> | N    |
| <i>K. pneumoniae</i> | None                     | DHA                                                            | 0,38                    | 0,047                    | 0,5                      | N        | N        | <b>D</b> | N    |
| <i>K. pneumoniae</i> | None                     | ESBL and phenotypically assessed impermeability                | 0,5                     | 1,5                      | 6                        | N        | N        | <b>D</b> | N    |
| <i>K. pneumoniae</i> | None                     | CTX-M1 and phenotypically assessed impermeability              | 0,75                    | 3                        | 24                       | N        | N        | <b>D</b> | N    |
| <i>K. pneumoniae</i> | None                     | CTX-M1 and phenotypically assessed impermeability              | 1,5                     | 6                        | >32                      | N        | N        | <b>D</b> | N    |
| <i>E. coli</i>       | None                     | CTX-M1                                                         | 0,25                    | 0,032                    | 0,006                    | N        | N        | <b>D</b> | N    |
| <i>E. aerogenes</i>  | None                     | AmpC overexpression                                            | 0,5                     | 0,38                     | 1,5                      | N        | N        | <b>D</b> | N    |

|                      |        |                                                                      |         |       |      |   |   |          |          |
|----------------------|--------|----------------------------------------------------------------------|---------|-------|------|---|---|----------|----------|
| <i>K. pneumoniae</i> | None   | DHA                                                                  | 0,25    | 0,094 | 0,38 | N | N | <b>D</b> | N        |
| <i>K. pneumoniae</i> | None   | ESBL and phenotypically assessed impermeability                      | 0,25    | 1     | 3    | N | N | <b>D</b> | N        |
| <i>E. cloacae</i>    | None   | AmpC overexpression and phenotypically assessed impermeability       | 2       | 1     | 2    | N | N | <b>D</b> | N        |
| <i>K. pneumoniae</i> | None   | Phenotypically assessed impermeability                               | 1       | 2     | 24   | N | N | <b>D</b> | N        |
| <i>E. coli</i>       | None   | CMY-2, ESBL (CTX-M1)                                                 | 0,38    | 0,047 | 0,25 | N | N | <b>D</b> | N        |
| <i>E. cloacae</i>    | None   | AmpC overexpression, ESBL and phenotypically assessed impermeability | 2 (0,5) | 0,25  | 1    | N | N | <b>D</b> | N        |
| <i>E. cloacae</i>    | OXA-48 | CTX-M1                                                               | 1,5     | 0,75  | 3    | P | P | <b>D</b> | P        |
| <i>K. pneumoniae</i> | OXA-48 | CTX-M1                                                               | 3       | 1     | 1,5  | P | P | <b>D</b> | P        |
| <i>K. pneumoniae</i> | OXA-48 | CTX-M1                                                               | 0,38    | 0,38  | 0,75 | P | P | <b>D</b> | P        |
| <i>E. coli</i>       | OXA-48 | CTX-M1                                                               | 1,5     | 0,25  | 0,38 | P | P | <b>D</b> | <b>D</b> |
| <i>E. coli</i>       | OXA-48 |                                                                      | 3       | 0,5   | 1,5  | P | P | <b>D</b> | <b>D</b> |
| <i>K. pneumoniae</i> | OXA-48 |                                                                      | 1,5     | 0,38  | 0,38 | P | P | <b>D</b> | <b>D</b> |
| <i>K. pneumoniae</i> | OXA-48 | ESBL                                                                 | 2       | 1     | 0,75 | P | P | <b>D</b> | <b>D</b> |
| <i>E. cloacae</i>    | OXA-48 | CTX-M9                                                               | 2       | 2     | 6    | P | P | <b>D</b> | <b>D</b> |
| <i>E. cloacae</i>    | OXA-48 | CTX-M9, SHV                                                          | 24      | 32    | > 32 | P | P | <b>D</b> | <b>D</b> |
| <i>K. pneumoniae</i> | None   | ESBL                                                                 | 0,25    | 0,38  | 1    | N | N | N        | <b>D</b> |

|                      |        |                                                                |       |       |       |   |   |          |           |
|----------------------|--------|----------------------------------------------------------------|-------|-------|-------|---|---|----------|-----------|
| <i>E. coli</i>       | None   | CTX-M1 and phenotypically assessed impermeability              | 1     | 3     | 16    | N | N | N        | <b>D</b>  |
| <i>E. aerogenes</i>  | None   | ESBL and phenotypically assessed impermeability                | 16    | 4     | > 32  | N | N | N        | <b>D</b>  |
| <i>S. marcescens</i> | None   | AmpC overexpression and phenotypically assessed impermeability | 6     | 3     | > 32  | N | N | N        | <b>D</b>  |
| <i>K. pneumoniae</i> | OXA-48 | CTX-M1                                                         | 0,75  | 0,5   | 1,5   | P | P | P        | <b>D</b>  |
| <i>K. pneumoniae</i> | OXA-48 | CTX-M1                                                         | 0,75  | 0,5   | 1     | P | P | P        | <b>D</b>  |
| <i>K. pneumoniae</i> | OXA-48 |                                                                | 1,5   | 1,5   | 1     | P | P | P        | <b>D</b>  |
| <i>K. pneumoniae</i> | None   | ESBL                                                           | 0,125 | 0,016 | 0,023 | N | N | <b>D</b> | <b>NI</b> |
| <i>K. pneumoniae</i> | None   | DHA and phenotypically assessed impermeability                 | 6     | 2     | > 32  | N | N | N        | <b>NI</b> |
| <i>K. pneumoniae</i> | None   | DHA                                                            | 0,75  | 0,19  | 0,38  | N | N | N        | <b>NI</b> |
| <i>K. pneumoniae</i> | OXA-48 | CTX-M1                                                         | 1     | 0,5   | 1,5   | P | P | P        | <b>NI</b> |
| <i>E. cloacae</i>    | None   | AmpC overexpression                                            | 0,5   | 0,38  | 0,38  | N | N | N        | <b>NI</b> |
| <i>E. cloacae</i>    | None   | AmpC overexpression and phenotypically assessed impermeability | 0,5   | 0,25  | 1,5   | N | N | N        | <b>NI</b> |
| <i>E. coli</i>       | OXA-48 | CTX-M1                                                         | 1,5   | 0,19  | 0,38  | P | P | P        | <b>N</b>  |
| <i>K. pneumoniae</i> | OXA-48 | CTX-M1                                                         | 1     | 1,5   | 1,5   | P | P | P        | <b>N</b>  |

P = positive ; N = negative; D = doubtful ; NI = non-interpretable
