# Supplementary material
Source: PubMed Central journal article supplement (PMC5277521)
Supplement: JCM.01853-16_zjm999095351s2.pdf [file JCM.01853-16_zjm999095351s2.pdf]

<sup>a</sup> P = positive ; N = negative; D = doubtful ; NI = non-interpretable. Replicate 1 (R1) was performed by operator 1, while replicates 2 (R2) and 3 (R3) were performed by operator 2.

<sup>b</sup> Final signal intensity in AU (measured at 29 minutes among CPE, and 59 minutes among NF)

<sup>c</sup> NA = Not assessed
